# Supplementary material
Source: PubMed Central journal article supplement (PMC5863059)
Supplement: NIHMS939059-supplement-2.pdf [file NIHMS939059-supplement-2.pdf]

## Supplementary Online Content

Dias MS, Rottmund CM, Cappos KM, et al. Association of a postnatal parent education program for abusive head trauma with subsequent pediatric abusive head trauma hospitalization rates. *JAMA Pediatr*. Published online January 30, 2017.  
doi:10.1001/jamapediatrics.2016.4218

**eTable 1.** Exposure to Program Elements Among 7-Month Survey Respondents

**eTable 2.** Self-reported Educational and Behavioral Changes Among Evaluable Postnatal and 7-Month Survey Respondents

This supplementary material has been provided by the authors to give readers additional information about their work.

**eTable 1. Exposure to Program Elements Among 7-Month Survey Respondents**

| <b>What part(s) of the shaken baby program did you receive?</b> | <b>Mothers</b> | <b>Fathers</b> |
|-----------------------------------------------------------------|----------------|----------------|
| Read a pamphlet/brochure                                        | 91/97 (93.8%)  | 41/42 (97.6%)  |
| Watched a video                                                 | 71/96 (74.7%)  | 26/42 (61.9%)  |
| Talked with a nurse                                             | 82/96 (85.4%)  | 33/42 (78.6%)  |
| Saw posters on the maternity unit                               | 79/97 (80.4%)  | 34/42 (81.0%)  |
| Signed a paper or form                                          | 94/96 (97.9%)  | 41/42 (97.6%)  |

Denominator indicates total number of survey respondents answering each individual question.

**eTable 2. Self-reported Educational and Behavioral Changes Among Evaluable Postnatal and 7-Month Survey Respondents**

|                                                                                   | Mothers                  |                  | Fathers              |                  |
|-----------------------------------------------------------------------------------|--------------------------|------------------|----------------------|------------------|
|                                                                                   | Postnatal                | 7-month          | Postnatal            | 7-month          |
| I learned a lot about normal infant crying*                                       | 10 958/12 041<br>(91.0%) | 84/98<br>(85.7%) | 2950/3329<br>(88.6%) | 38/44<br>(86.4%) |
| I learned a lot about calming my baby*                                            | 11 023/11 956<br>(92.2%) | 79/99<br>(79.8%) | 2923/3287<br>(88.9%) | 33/44<br>(75.0%) |
| I learned a lot about keeping myself calm*                                        | 11 396/12 050<br>(94.6%) | 84/99<br>(84.8%) | 3035/3302<br>(91.9%) | 39/44<br>(88.6%) |
| I learned a lot about choosing other caregivers for my baby*                      | 10 060/11 816<br>(85.1%) | 73/99<br>(73.7%) | 2688/3222<br>(83.4%) | 31/44<br>(70.5%) |
| This information will decrease the likelihood that parents will shake a baby*     | 11 435/12 057<br>(94.8%) | 90/98<br>(91.8%) | 3201/3342<br>(95.8%) | 40/42<br>(92.2%) |
| I thought about this information while my baby was crying                         | N/A                      | 74/99<br>(74.7%) | N/A                  | 35/44<br>(79.5%) |
| This information helped me select other people to care for my child               | N/A                      | 74/98<br>(75.5%) | N/A                  | 31/44<br>(70.5%) |
| Based on this information I decided not to leave my baby alone with somebody else | N/A                      | 27/97<br>(27.8%) | N/A                  | 11/42<br>(26.2%) |
| I have shared this information with others                                        | N/A                      | 46/98<br>(46.9%) | N/A                  | 15/43<br>(34.9%) |

Denominator indicates total number of survey respondents answering each individual question.

\* Percentage of respondents who responded to each individual statement with “strongly agree” or “agree.”

N/A: not applicable

© 2017 American Medical Association. All rights reserved.
